# Supplementary material for: First-principles studies of gas molecule adsorption on a LaB6(100) surface
Source: Royal Society of Chemistry journal article supplement (doi:10.1039/d4cp02520b), 2024-01-01
Supplement: d4cp02520b1.pdf [file d4cp02520b1.pdf]

## Electronic Supporting Information

1           **First-principles studies of gas molecules adsorption on LaB<sub>6</sub>(100) surface**

2                                   Rui Wang<sup>1</sup>, Z. J. Ding<sup>1,2\*</sup>

3       <sup>1</sup>*Department of Physics, University of Science and Technology of China, Hefei 230026, Anhui, P.R.*  
4                                   *China*

5       <sup>2</sup>*Hefei National Research Center for Physical Sciences at Microscale, University of Science and*  
6                                   *Technology of China, Hefei 230026, Anhui, P.R. China*

7                                   \*Corresponding Author: [zjding@ustc.edu.cn](mailto:zjding@ustc.edu.cn)

8

## 9 1 Convergence test

10 For the cutoff energy, k-point grid, vacuum layer thickness, and number of atomic layers used in our  
 11 calculations, we have conducted convergence tests. The following content demonstrates that our  
 12 choices regarding these parameters are relatively reasonable.

### 13 1.1 Cutoff energy

14 Under the conditions of a fixed k-point grid of  $3\times 3\times 1$ , a vacuum layer thickness of  $18 \text{ \AA}$ , and four  
 15 atomic layers, we conducted convergence tests for the plane-wave basis set cutoff energy. The results  
 16 of the convergence tests are displayed in Table S1.

17 **Table S1** The relationship between cutoff energy ( $E_{\text{cut}}$ ) and average atomic energy ( $E/\text{atom}$ ).

| $E_{\text{cut}}$ (eV) | $E/\text{atom}$ (eV) |
|-----------------------|----------------------|
| 350                   | -6.9332              |
| 400                   | -6.9332              |
| 450                   | -6.9346              |
| 500                   | -6.9349              |
| 550                   | -6.9355              |

18 The reason for choosing a cutoff energy of 450 eV is that even if we increase the cutoff energy to 550  
 19 eV, the change in  $E/\text{atom}$  is only 0.9 meV. Considering both computational resources and accuracy,  
 20 selecting a cutoff energy of 450 eV is reasonable.

### 21 1.2 K-point grid

22 Similarly, we fixed the cutoff energy at 450 eV, the vacuum layer thickness at  $18 \text{ \AA}$ , and the number  
 23 of atomic layers at 4, and conducted a convergence test on the k-point grid. The test results are shown  
 24 in Table S2. As can be seen, for the  $3\times 3\times 1$  k-point grid that we selected, when compared with the  
 25  $5\times 5\times 1$  k-point grid, the difference in average atomic energy is only 0.9 meV.

26

27

28

29

30 **Table S2** The relationship between k-point grid and average atomic energy ( $E/\text{atom}$ ).

| k-point grid | $E/\text{atom}$ (eV) |
|--------------|----------------------|
| 1×1×1        | -6.9304              |
| 2×2×1        | -6.9350              |
| 3×3×1        | -6.9346              |
| 4×4×1        | -6.9347              |
| 5×5×1        | -6.9337              |

### 31 1.3 Vacuum layer thickness

32 For the convergence test of the vacuum layer thickness, we fixed the cutoff energy at 450 eV, the k-  
33 point grid at 3×3×1, and the number of atomic layers at 4. The test results are displayed in Table S3.

34 **Table S3** The relationship vacuum layer thickness ( $h$ ) and average atomic energy ( $E/\text{atom}$ ).

| $h/\text{\AA}$ | $E/\text{atom}$ (eV) |
|----------------|----------------------|
| 14             | -6.9346              |
| 16             | -6.9346              |
| 18             | -6.9347              |
| 20             | -6.9347              |
| 22             | -6.9337              |

### 35 1.4 Atomic layer

36 In the testing of atomic layers, continuing to use average atomic energy as a criterion for determining  
37 convergence is unreasonable. As the number of atomic layers increases, the atoms exhibiting bulk  
38 properties in our simulated system become more prevalent, while those with surface properties be-  
39 come fewer. If energy is averaged per atom in this context, there will be a noticeable reduction in  
40 atomic energy as the number of layers increases. This reduction occurs because the average atomic  
41 energy increasingly approaches that of the bulk atoms. Considering the above perspective, we use  
42 surface energy as the convergence criterion for determining the number of atomic layers. The defini-  
43 tion of surface energy is as follows:

$$44 \gamma_s = \frac{1}{2A} (E_s^{\text{unrelax}} - NE_b) + \frac{1}{A} (E_s^{\text{relax}} - E_s^{\text{unrelax}}) \quad (1)$$

45 In equation (1),  $E_s^{\text{unrelax}}$  represents the energy of the surface without geometric structural optimiza-  
 46 tion,  $E_s^{\text{relax}}$  represents the energy of the surface after geometric structural optimization,  $E_b$  represents  
 47 the average energy per atom of the bulk phase LaB<sub>6</sub>,  $N$  is the number of atoms in the surface model,  
 48 and  $A$  represents the area of the surface. Table S4 displays the relationship between the number of  
 49 atomic layers obtained and the surface energy. Even with an increase to six atomic layers, the result-  
 50 ing surface energy error is only 0.0018 eV/Å<sup>2</sup>.

51 **Table S4** The relationship between the number of atomic layers and surface energy ( $\gamma_s$ ).

| Atomic layer | $\gamma_s$ (eV / Å <sup>2</sup> ) |
|--------------|-----------------------------------|
| 2            | 0.1722                            |
| 3            | 0.1729                            |
| 4            | 0.1722                            |
| 5            | 0.1733                            |
| 6            | 0.1740                            |

52

## 53 2 The most stable adsorption structures

54 For each molecule, we summarize the detailed geometric data of its most stable molecular adsorption  
 55 structure and most stable dissociative adsorption structure in table S5, as they have the minimum ad-  
 56 sorption energy and thus are the focus of our study.

57

58

59

60

61

62

63

64

**Table S5** The bond length of the most stable adsorption structure.

65

| configuration      | bond length (Å) | configuration      | bond length (Å) |
|--------------------|-----------------|--------------------|-----------------|
| CO <sub>2</sub> -M | C-O1=1.33       | CO <sub>2</sub> -D | C-O2=1.44       |
|                    | C-O2=1.33       |                    | O2-La1=2.46     |
|                    | O1-La3=2.67     |                    | O2-La4=2.46     |
|                    | O1-La4=2.67     |                    | C-B1=1.54       |
|                    | O2-La1=2.66     |                    | O1-B2=1.39      |
|                    | O2-La2=2.67     |                    |                 |
|                    | C-B1=1.55       |                    |                 |
| H <sub>2</sub> O-M | O-H1=0.97       | H <sub>2</sub> O-D | H1-B1=1.22      |
|                    | O-H2=1.11       |                    | H2-B2=1.22      |
|                    | O-La1=2.66      |                    | O-La1=2.22      |
|                    | H2-B1=1.80      |                    | O-La2=2.22      |
| O <sub>2</sub> -M  | O1-La3=2.26     | O <sub>2</sub> -D  | O1-B1=1.47      |
|                    | O2-La2=2.21     |                    | O2-B1=1.47      |
|                    | O1-O2=1.45      |                    | O1-La3=2.34     |
|                    | O2-La3=2.53     |                    | O1-La4=2.34     |
| N <sub>2</sub> -M  |                 | N <sub>2</sub> -D  | O2-La1=2.34     |
|                    |                 |                    | O2-La2=2.34     |
|                    | N1-N2=1.56      |                    | N1-B1=1.42      |
|                    | N1-La1=2.51     |                    | N2-B2=1.42      |
|                    | N1-La2=2.50     |                    |                 |
|                    | N2-La3=2.50     |                    |                 |
|                    | N2-La4=2.51     |                    |                 |
| N1-B1=1.56         |                 |                    |                 |
| N2-B1=2.56         |                 |                    |                 |

### 66 3 Other adsorption structure

67 In this study, we only discuss the most stable molecular adsorption structure and the most stable dis-  
68 sociative adsorption structure for each adsorbate. During the geometric optimization process, we ac-  
69 tually considered many structures. Therefore, for those structures with negative adsorption energies  
70 but not the most stable, we present them collectively in Figures S1 to S4. We will first uniformly  
71 name these structures to facilitate the summary of their adsorption energies in Table S6. For the

72 adsorption of  $O_2$  molecules, the adsorption structures are displayed in Figure S1. From left to right,  
73 we label them as  $O_2$ -1,  $O_2$ -2, up to  $O_2$ -5, such that the structure in Figure S1 (a) is marked as  $O_2$ -1,  
74 the structure in Figure S1 (b) as  $O_2$ -2, and so forth. For the adsorption of other molecules, we also  
75 adopt a similar labeling scheme.

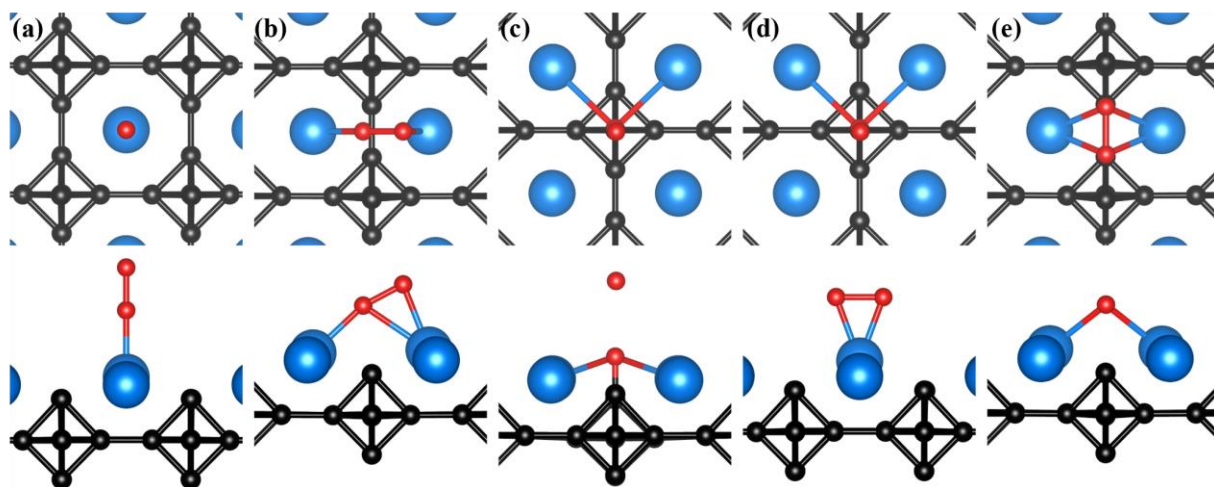

76

77 **Figure S1**  $O_2$  on  $LaB_6(100)$ : Non-most stable molecular adsorption configurations and non-most stable dissociative  
78 adsorption configurations. (a)-(e) represent different adsorption structures, with the top half showing top views and  
79 the bottom half showing side views.

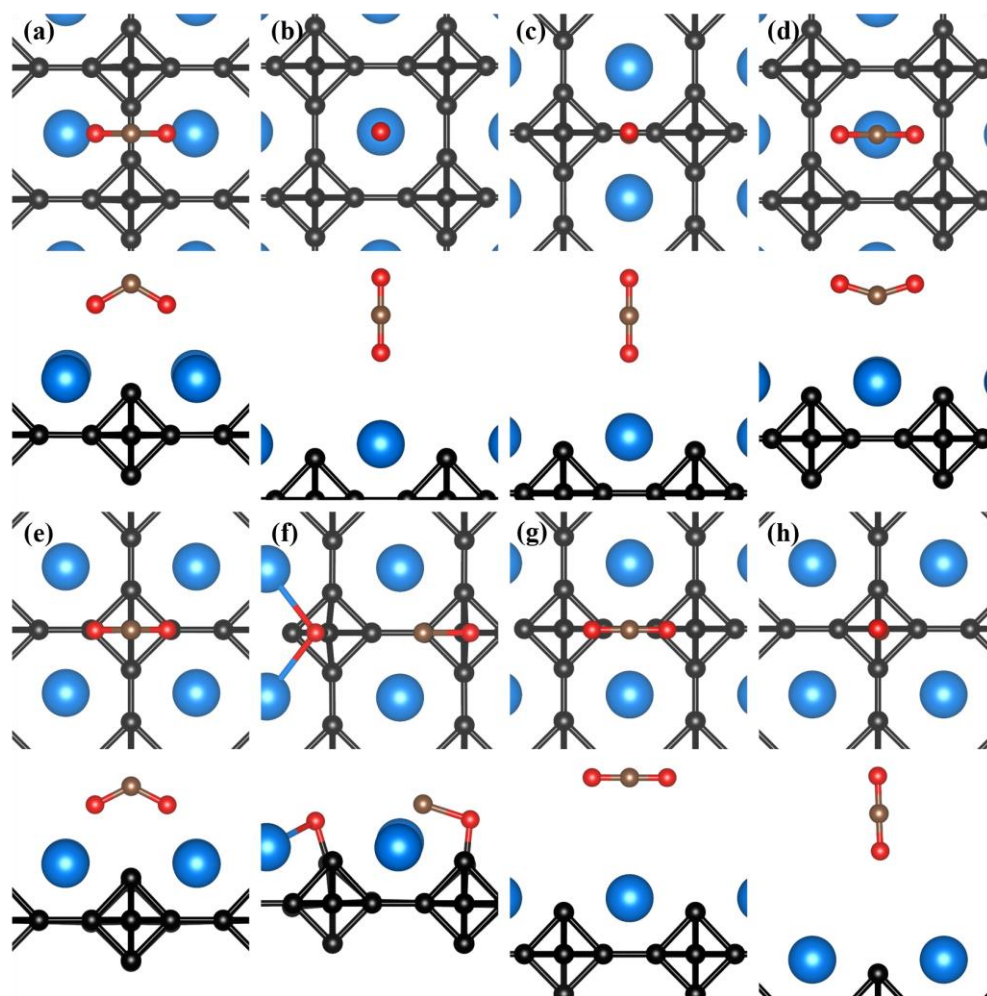

80

81 **Figure S2** CO<sub>2</sub> on LaB<sub>6</sub>(100): Non-most stable molecular adsorption configurations and non-most stable dissociative adsorption configurations. (a)-(h) represent different adsorption structures, with the top half showing top views  
82 and the bottom half showing side views.  
83

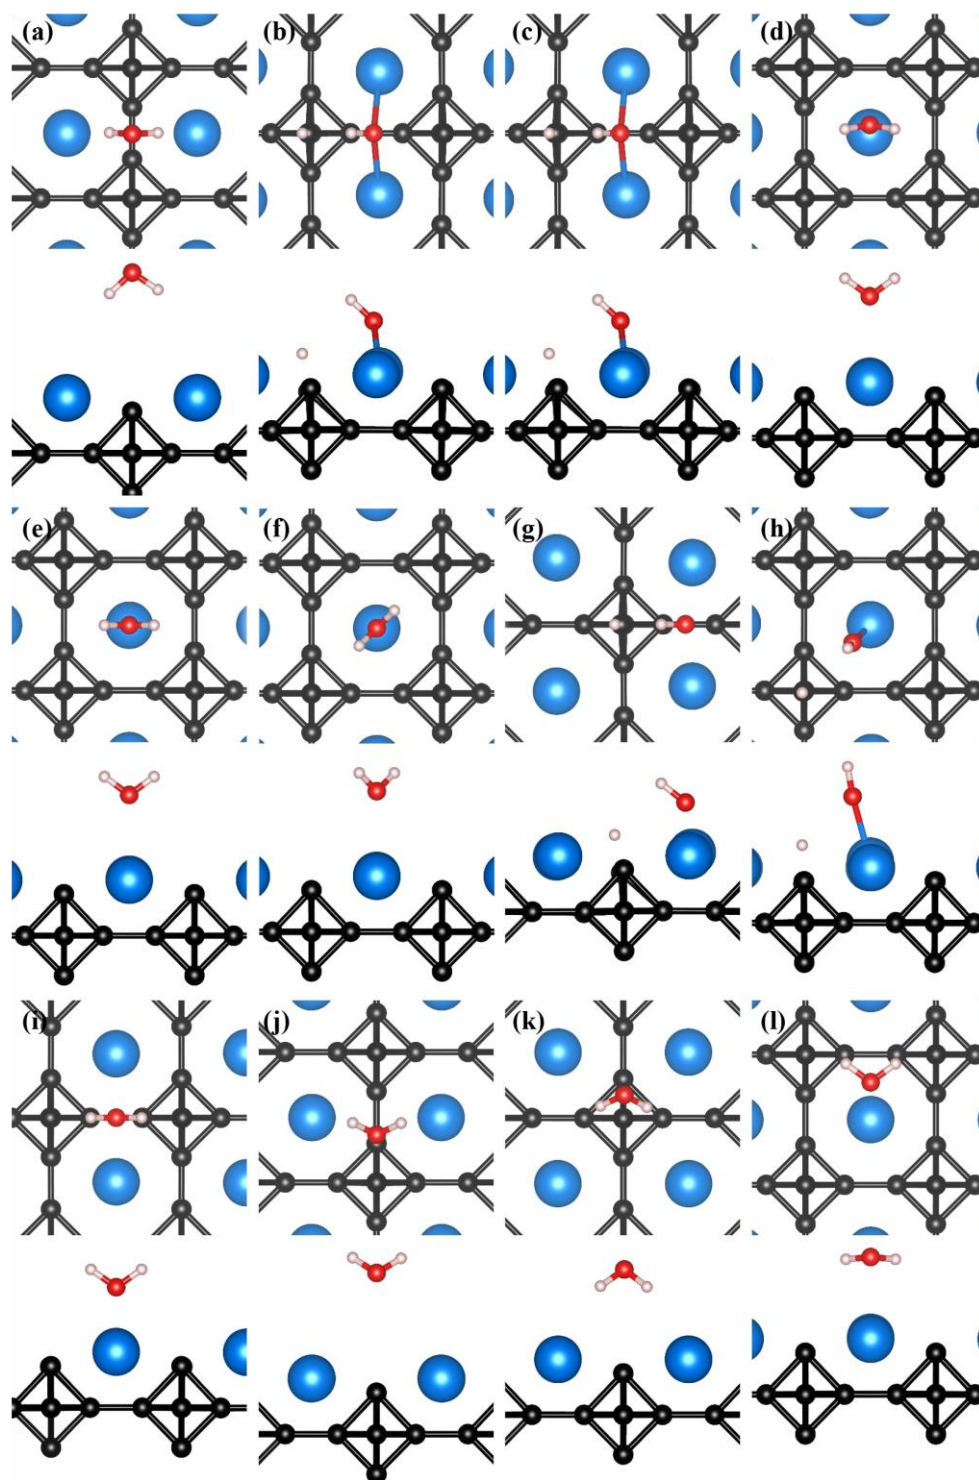

84

85 **Figure S3** H<sub>2</sub>O on LaB<sub>6</sub>(100): Non-most stable molecular adsorption configurations and non-most stable dissociative  
 86 adsorption configurations. (a)-(l) represent different adsorption structures, with the top half showing top views  
 87 and the bottom half showing side views.



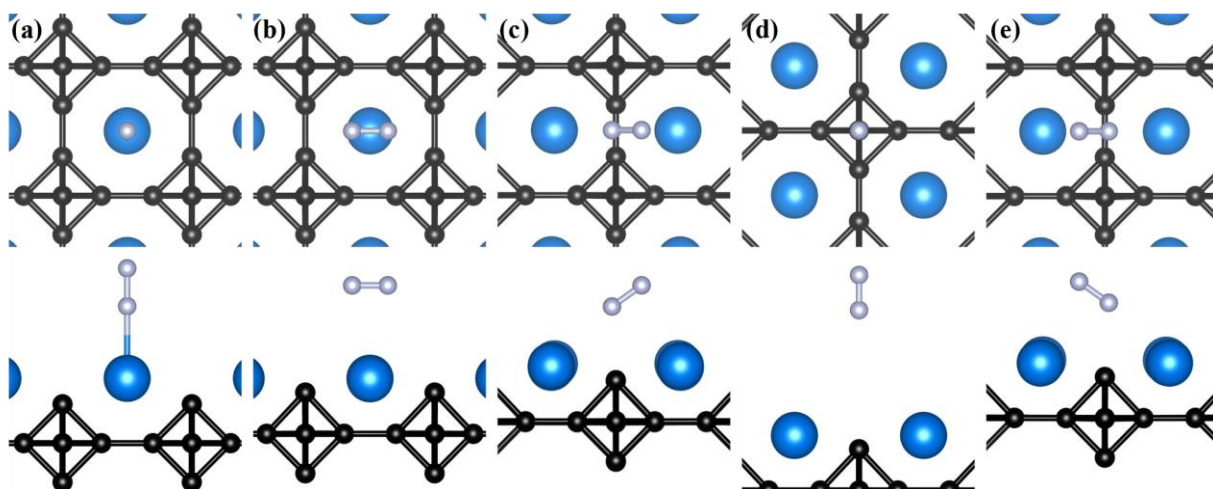

88

89 **Figure S4**  $N_2$  on  $LaB_6(100)$ : Non-most stable molecular adsorption configurations and non-most stable dissociative  
 90 adsorption configurations. (a)-(e) represent different adsorption structures, with the top half showing top views and  
 91 the bottom half showing side views.

92

**Table S6** Adsorption energy of non-most stable adsorption structures.

| configuration      | $E_{ads}$ (eV) | configuration      | $E_{ads}$ (eV) | configuration       | $E_{ads}$ (eV) |
|--------------------|----------------|--------------------|----------------|---------------------|----------------|
| O <sub>2</sub> -1  | -1.68          | CO <sub>2</sub> -6 | -1.07          | H <sub>2</sub> O-8  | -2.08          |
| O <sub>2</sub> -2  | -3.55          | CO <sub>2</sub> -7 | -0.10          | H <sub>2</sub> O-9  | -0.51          |
| O <sub>2</sub> -3  | -3.11          | CO <sub>2</sub> -8 | -0.01          | H <sub>2</sub> O-10 | -0.11          |
| O <sub>2</sub> -4  | -2.76          | H <sub>2</sub> O-1 | -0.04          | H <sub>2</sub> O-11 | -0.41          |
| O <sub>2</sub> -5  | -3.43          | H <sub>2</sub> O-2 | -2.15          | H <sub>2</sub> O-12 | -0.61          |
| CO <sub>2</sub> -1 | -0.74          | H <sub>2</sub> O-3 | -0.48          | N <sub>2</sub> -1   | 5.09           |
| CO <sub>2</sub> -2 | -0.08          | H <sub>2</sub> O-4 | -0.59          | N <sub>2</sub> -2   | -0.17          |
| CO <sub>2</sub> -3 | -0.06          | H <sub>2</sub> O-5 | -0.53          | N <sub>2</sub> -3   | -0.74          |
| CO <sub>2</sub> -4 | -0.07          | H <sub>2</sub> O-6 | -0.49          | N <sub>2</sub> -4   | -0.02          |
| CO <sub>2</sub> -5 | -1.55          | H <sub>2</sub> O-7 | -2.09          | N <sub>2</sub> -5   | -0.71          |

#### 93 4 The difference between total energy and free energy

94 We use  $E$  to represent the calculated total energy,  $F$  to represent the calculated free energy, and  $N$  to  
 95 represent the number of atoms in the system. Our results show that  $|E-F|/N$  less than 1 meV is satis-  
 96 fied for all structures studied. Table S7 shows our calculation results.

97

98

99

100

101

102 **Table S7** Total energy and free energy of the most stable configurations.

| configuration      | $E$ (eV) | $F$ (eV) | $ E-F /N$ (meV) |
|--------------------|----------|----------|-----------------|
| CO <sub>2</sub> -M | -3133.30 | -3133.36 | 0.13            |
| CO <sub>2</sub> -D | -3133.48 | -3133.56 | 0.17            |
| H <sub>2</sub> O-M | -3121.85 | -3121.92 | 0.16            |
| H <sub>2</sub> O-D | -3123.43 | -3123.50 | 0.16            |
| O <sub>2</sub> -M  | -3120.17 | -3120.26 | 0.20            |
| O <sub>2</sub> -D  | -3125.09 | -3125.18 | 0.18            |
| N <sub>2</sub> -M  | -3124.04 | -3124.13 | 0.20            |
| N <sub>2</sub> -D  | -3127.13 | -3127.21 | 0.17            |

103 **5 Density of state**

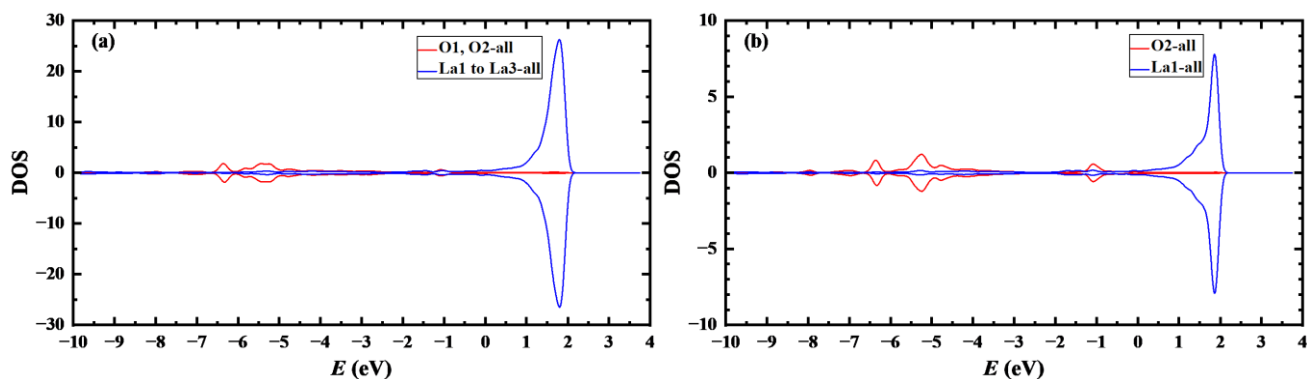

104 **Figure S5** The electronic density of states of CO<sub>2</sub>M (a) and CO<sub>2</sub>-D (b). (a): The sum of the orbitals of O1 and O2  
 105 (red), the sum of the orbitals of La1 to La3 (blue); (b): The orbitals sum of O2 (red) and the orbitals sum of La1 (blue).  
 106

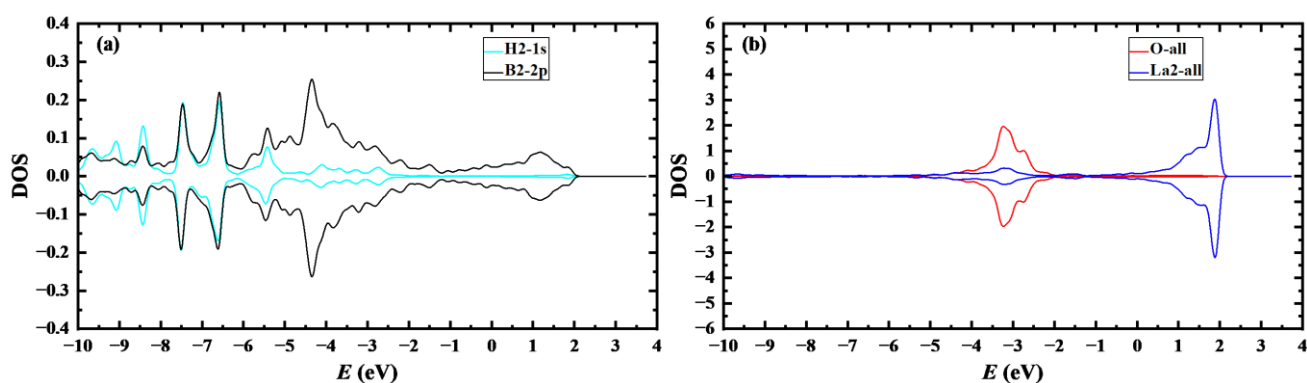

107 **Figure S6** The electronic density of states of H<sub>2</sub>O-D. (a): H<sub>2</sub> 1s (cyan), B<sub>2</sub> 2p (black); (b): The orbitals sum of O  
 108 (red) and the orbitals sum of La2 (blue).  
 109

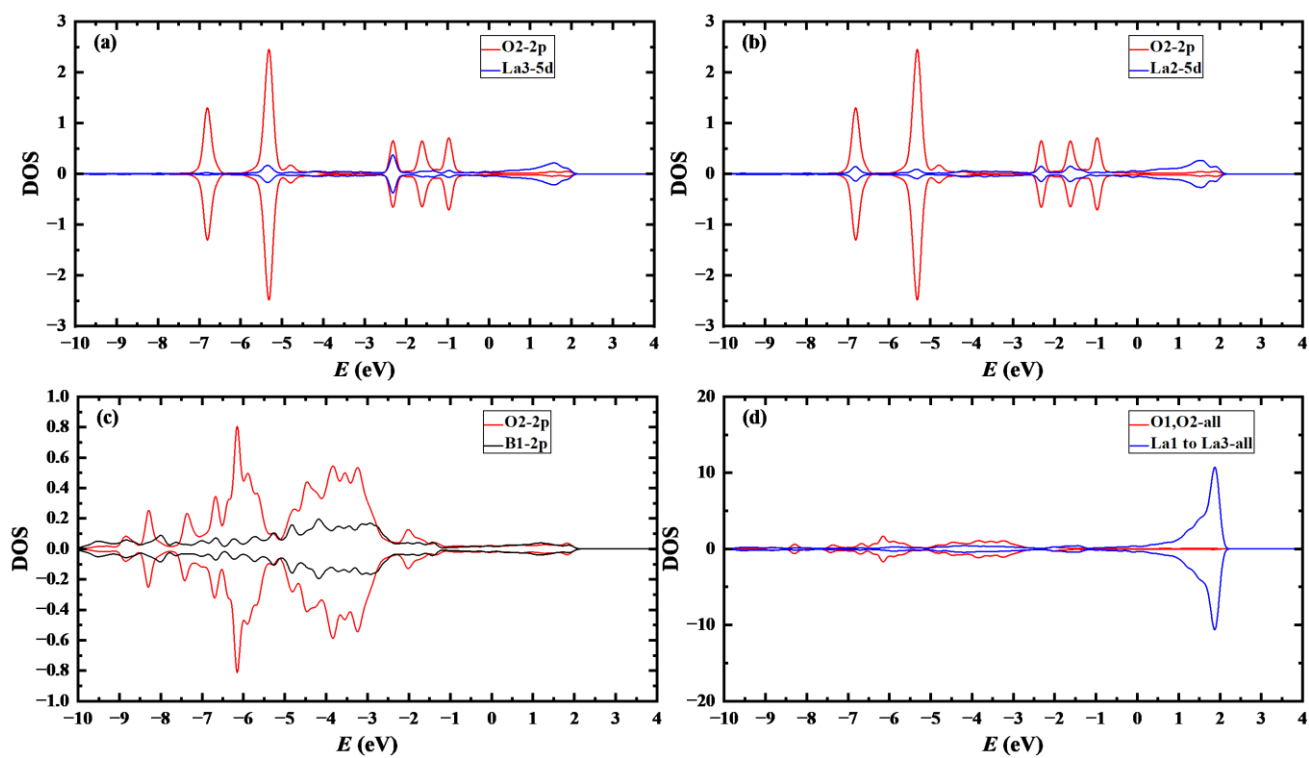

110

111 **Figure S7** The electronic density of states of O<sub>2</sub>-M (a, b) and O<sub>2</sub>-D (c, d). (a): O2 2p (red), La3 5d (blue); (b): O2 2p  
 112 (red), La2 5d (blue); (c): O2 2p (red), B1 2p (black); (d): The total orbitals sum of O1 and O2 (red), as well as the  
 113 total orbitals sum of La1 to La3 (blue).

114

115

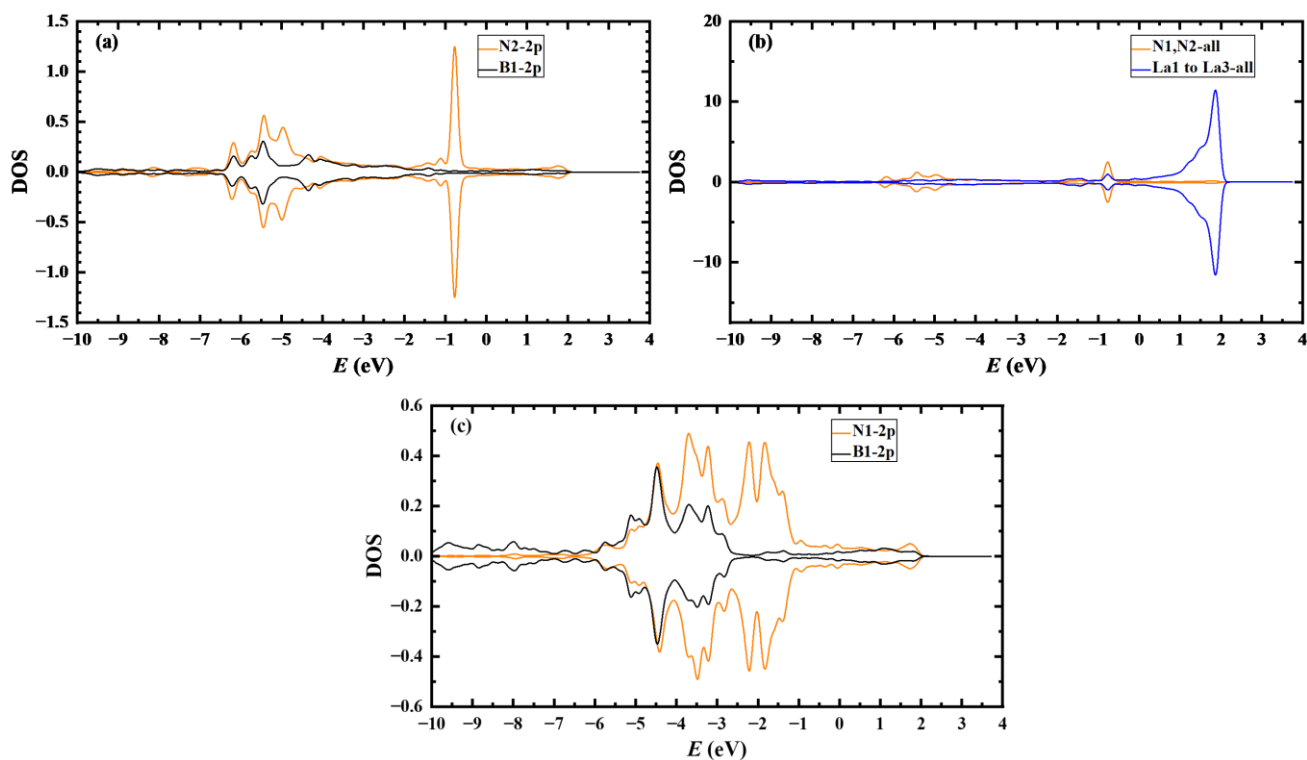

116

117 **Figure S8** The electronic density of states of  $N_2$ -M (a, b) and  $N_2$ -D (c). (a):  $N_2$   $2p$  (orange),  $B1$   $2p$  (black); (b): The  
 118 total orbitals sum of  $N1$  and  $N2$  (orange), as well as the total orbitals sum of  $La1$  to  $La3$  (blue); (c):  $N1$   $2p$  (orange),  
 119  $B1$   $2p$  (black).

## 120 6 Band structure of bulk $LaB_6$

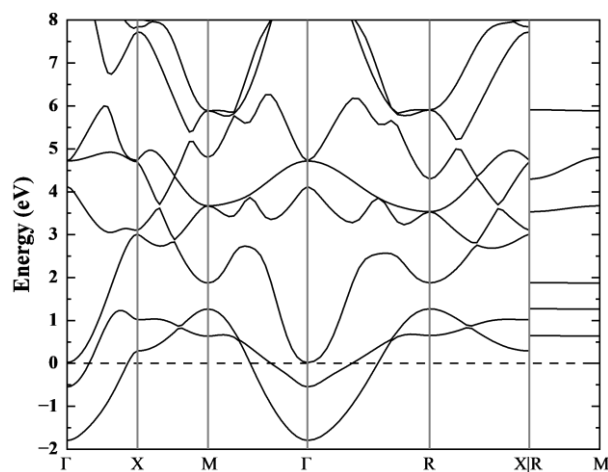

121

122 **Figure S9** The band structure of bulk  $LaB_6$ , with the dashed line indicating the position of the Fermi level.
